# Supplementary material for: Fast and Noninvasive Hair Test for Preliminary Diagnosis of Mood Disorders
Source: MDPI journal article supplement (doi:10.3390/molecules27165318), 2022-08-20
Supplement: s1 [file s1]

**Table S1.** Summary of information about sex, age, and hair colors in the control group.

| ID  | SEX* | AGE | HAIR COLOR | ID  | SEX* | AGE | HAIR COLOR |
|-----|------|-----|------------|-----|------|-----|------------|
| C1  | K    | 21  | Brown      | C39 | K    | 21  | Brown      |
| C2  | M    | 22  | Black      | C40 | M    | 21  | Brown      |
| C3  | K    | 20  | Blonde     | C41 | M    | 39  | Brown      |
| C4  | K    | 47  | Black      | C42 | M    | 48  | Gray       |
| C5  | K    | 19  | Louis      | C43 | K    | 19  | Blonde     |
| C6  | K    | 18  | Blonde     | C44 | K    | 22  | Brown      |
| C7  | K    | 20  | Louis      | C45 | K    | 51  | Blonde     |
| C8  | K    | 27  | Louis      | C46 | K    | 49  | Brown      |
| C9  | M    | 38  | Brown      | C47 | K    | 23  | Brown      |
| C10 | M    | 19  | Brown      | C48 | K    | 21  | Brown      |
| C11 | K    | 20  | Brown      | C49 | K    | 19  | Brown      |
| C12 | M    | 22  | Blonde     | C50 | K    | 19  | Brown      |
| C13 | M    | 22  | Blonde     | C51 | K    | 18  | Blonde     |
| C14 | K    | 21  | Brown      | C52 | K    | 18  | Blonde     |
| C15 | K    | 22  | Louis      | C53 | K    | 20  | Blonde     |
| C16 | K    | 21  | Black      | C54 | K    | 34  | Brown      |
| C17 | K    | 22  | Brown      | C55 | K    | 22  | Brown      |
| C18 | K    | 21  | Louis      | C56 | K    | 48  | Brown      |
| C19 | K    | 21  | Louis      | C57 | K    | 22  | Blonde     |
| C20 | K    | 21  | Louis      | C58 | K    | 43  | Blonde     |
| C21 | K    | 21  | Blonde     | C59 | K    | 35  | Blonde     |
| C22 | K    | 46  | Gray       | C60 | M    | 27  | Black      |
| C23 | K    | 52  | Gray       | C61 | K    | 22  | Blonde     |
| C24 | K    | 29  | Louis      | C62 | K    | 30  | Brown      |
| C25 | K    | 24  | Louis      | C63 | K    | 45  | Louis      |
| C26 | K    | 51  | Redheads   | C64 | K    | 48  | Blonde     |
| C27 | M    | 23  | Brown      | C65 | K    | 25  | Louis      |
| C28 | K    | 40  | Blonde     | C66 | K    | 38  | Blonde     |
| C29 | K    | 25  | Louis      | C67 | K    | 51  | Brown      |
| C30 | M    | 27  | Louis      | C68 | K    | 59  | Brown      |
| C31 | K    | 43  | Blonde     | C69 | K    | 51  | Redheads   |
| C32 | M    | 53  | Gray       | C70 | K    | 56  | Black      |
| C33 | K    | 21  | Brown      | C71 | K    | 28  | Blonde     |
| C34 | M    | 21  | Blonde     | C72 | K    | 47  | Brown      |
| C35 | K    | 18  | Brown      | C73 | K    | 45  | Louis      |
| C36 | M    | 51  | Black      | C74 | K    | 46  | Brown      |
| C37 | K    | 31  | Brown      | C75 | K    | 23  | Brown      |
| C38 | K    | 18  | Brown      |     |      |     |            |

\*W- woman, M- man,

**Table S2.** Summary of information about sex, age, used drugs, the dose, dosage, and hair colours, in the patients group.

| ID  | SEX* | AGE | DRUG** | DOSE [mg] | DOSAGE   | HAIR COLOR |
|-----|------|-----|--------|-----------|----------|------------|
| P1  | W    | 69  | TRA    | 150       | 0-0-1    | Grey       |
|     |      |     | VEN    | 75        | 1-0-0    |            |
| P2  | W    | 43  | SER    | 50        | 0-0-1    | Grey       |
|     |      |     | TRA    | 150       | 2-0-0    |            |
| P3  | W    | 55  | VEN    | 75        | 1-0-0    | Black      |
| P4  | W    | 39  | SER    | 50        | 0-0-1    | Black      |
| P5  | W    | 59  | VEN    | 150       | 1-0-0    | Black      |
| P6  | M    | 56  | DUL    | 60        | 1-0-0    | Grey       |
|     |      |     | TRA    | 150       | 0-0-1    |            |
| P7  | W    | 47  | MIR    | 15        | 1-0-0    | Black      |
|     |      |     | VEN    | 75        | 1-0-0    |            |
| P8  | W    | 49  | SER    | 100       | 1-0-0    | Grey       |
|     |      |     | TRA    | 150       | 0-0-1    |            |
| P9  | M    | 64  | DUL    | 30        | 1-0-0    | Grey       |
| P10 | M    | 64  | SER    | 50        | 1-1-0    | Grey       |
| P11 | M    | 53  | SER    | 50        | 1-1-0    | Grey       |
| P12 | M    | 61  | DUL    | 60        | 1-0-0    | Grey       |
|     |      |     | QUET   | 25        | 1-0-1    |            |
| P13 | M    | 48  | VEN    | 75        | 1-0-0    | Black      |
| P14 | W    | 37  | SER    | 50        | 1-0-0    | Black      |
| P15 | W    | 45  | TRA    | 75        | 0-0-1.33 | Blonde     |
|     |      |     | VEN    | 75        | 2-0-0    |            |
| P16 | M    | 61  | MIR    | 30        | 0-0-1    | Grey       |
|     |      |     | QUET   | 75        | 1-0-0    |            |
|     |      |     | VEN    | 150       | 1-0-0    |            |
| P17 | K    | 42  | VEN    | 75        | 1-0-0    | Black      |
| P18 | M    | 51  | VEN    | 75        | 1-0-0    | Grey       |
| P19 | W    | 58  | PAR    | 20        | 1-0-0    | Grey       |
| P20 | M    | 37  | CIT    | 10        | 1-0-0    | Blonde     |
|     |      |     | QUET   | 200       | 0-0-1    |            |
| P21 | W    | 49  | DUL    | 30        | 1-0-0    | Blonde     |
|     |      |     | FLUX   | 10        | 1-0-1    |            |
|     |      |     | TRA    | 150       | 0-0-1    |            |
| P22 | W    | 80  | MIR    | 30        | 1-0-1    | Grey       |
| P23 | M    | 57  | DUL    | 60        | 1-0-0    | Brown      |
| P24 | W    | 42  | SER    | 50        | 1-0-0    | Brown      |
|     |      |     | TRA    | 50        | 1-0-0    |            |
| P25 | W    | 51  | SER    | 50        | 1-0-0    | Blonde     |
| P26 | W    | 51  | QUET   | 75        | 1-0-0    | Blonde     |
| P27 | M    | 55  | SER    | 50        | 2-0-0    | Grey       |
| P28 | K    | 44  | QUET   | 40        | 1-0-1    | Blonde     |
| P29 | M    | 41  | VEN    | 150       | 1-0-1    | Black      |
| P30 | W    | 37  | OLA    | 5         | 0-0-1    | Brown      |
|     |      |     | SER    | 100       | 1-0-0    |            |
| P31 | W    | 47  | FLUX   | 10        | 2-0-0    | Blonde     |
|     |      |     | TRA    | 150       | 0-0-1    |            |

|     |   |    |     |      |         |          |
|-----|---|----|-----|------|---------|----------|
| P32 | W | 66 | SER | 100  | 1-0-1   | Grey     |
| P33 | W | 30 | SER | 50   | 1-0-0   | Brown    |
| P34 | K | 48 | OLA | 5    | 1-0-1   | Blonde   |
|     |   |    | DUL | 60   | 1-0-1   |          |
| P35 | W | 50 | DUL | 60   | 1-0-1   | Blonde   |
| P36 | W | 29 | AMI | 10   | 1-0-1   | Redheads |
|     |   |    | LAM | 100  | 1-0-2   |          |
| P37 | W | 25 | SER | 50   | 2-1-0   | Black    |
| P38 | M | 42 | TRA | 150  | 1-0-1   | Grey     |
| P39 | M | 29 | DUL | 0,03 | 0-0-1   | Blonde   |
|     |   |    | LAM | 0,05 | 1-0-1   |          |
|     |   |    | TRA | 150  | 1-0-1   |          |
| P40 | W | 55 | OLA | 5    | 1-0-2   | Blonde   |
|     |   |    | SER | 50   | 1-0.5-0 |          |
|     |   |    | TRA | 300  | 0-0-0.5 |          |

\*W- woman, M- man,

\*\*TRA – Taradone; SER - Sertraline; OLA - Olanzapine; LAM - Lamotrygine; DUL - Duloxetine; AMI - Amitriptyline; VEN - Venlafaxine; FLUX – Fluoxetine; MIR – Mirtazapine; QUET – Quetiapine;
